# Supplementary material
Source: HighWire-hosted journal article supplement (https://ijgc.bmj.com/content/33/4/504)

# Supplemental Figure 3

**Prognostic Risk Score Generation.** (A) multivariable model containing subject matter-informed covariates that might inform patient risk, assessable via the EHR records. (B) KM curve showing “high” vs. “low” risk in the entire cohort, separated by median for visualization purposes.

(A)

| variable                                    | HR               | p-value |
|---------------------------------------------|------------------|---------|
| ECOG 2+ vs. 0-1                             | 1.85 (1.15-2.95) | 0.0106  |
| Age at Tx start (per decade increase)       | 0.97 (0.8-1.18)  | 0.7692  |
| Academic vs. Community setting              | 0.7 (0.45-1.1)   | 0.1202  |
| Body Mass Index                             | 1 (0.98-1.02)    | 0.8401  |
| Stage III/IV vs. I/II at original diagnosis | 1.53 (1.04-2.24) | 0.0297  |
| Albumin less than LLN                       | 1.9 (1.24-2.91)  | 0.0032  |
| Alk Phos greater than ULN                   | 1.25 (0.74-2.12) | 0.3983  |
| Hemoglobin less than LLN                    | 1.4 (0.96-2.05)  | 0.0834  |
| Opioid use pre-therapy (yes vs. no)         | 1.42 (0.95-2.14) | 0.0898  |
| TP53 mutation (yes vs. no)                  | 1.49 (1.01-2.2)  | 0.0462  |
| CTNNB1 mutation (yes vs. no)                | 1.14 (0.71-1.84) | 0.5859  |

(B)

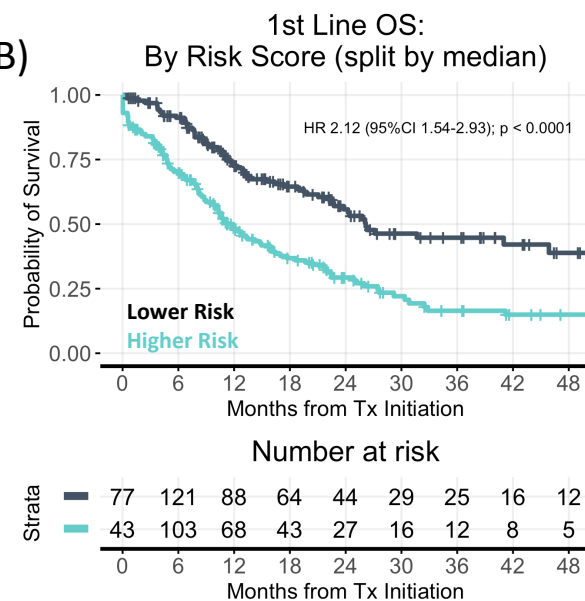

Supplement: inline-supplementary-material-2 [file inline-supplementary-material-2.pdf]
