# Supplementary material
Source: HighWire-hosted journal article supplement (https://ijgc.bmj.com/content/33/4/504)

## Supplemental Figure 2

**MSI, POLE, and POLD1 are better predictors of TMB than histology.** A multivariable model was constructed from all evaluable specimens in the database, evaluating the independent contributions to TMB levels.

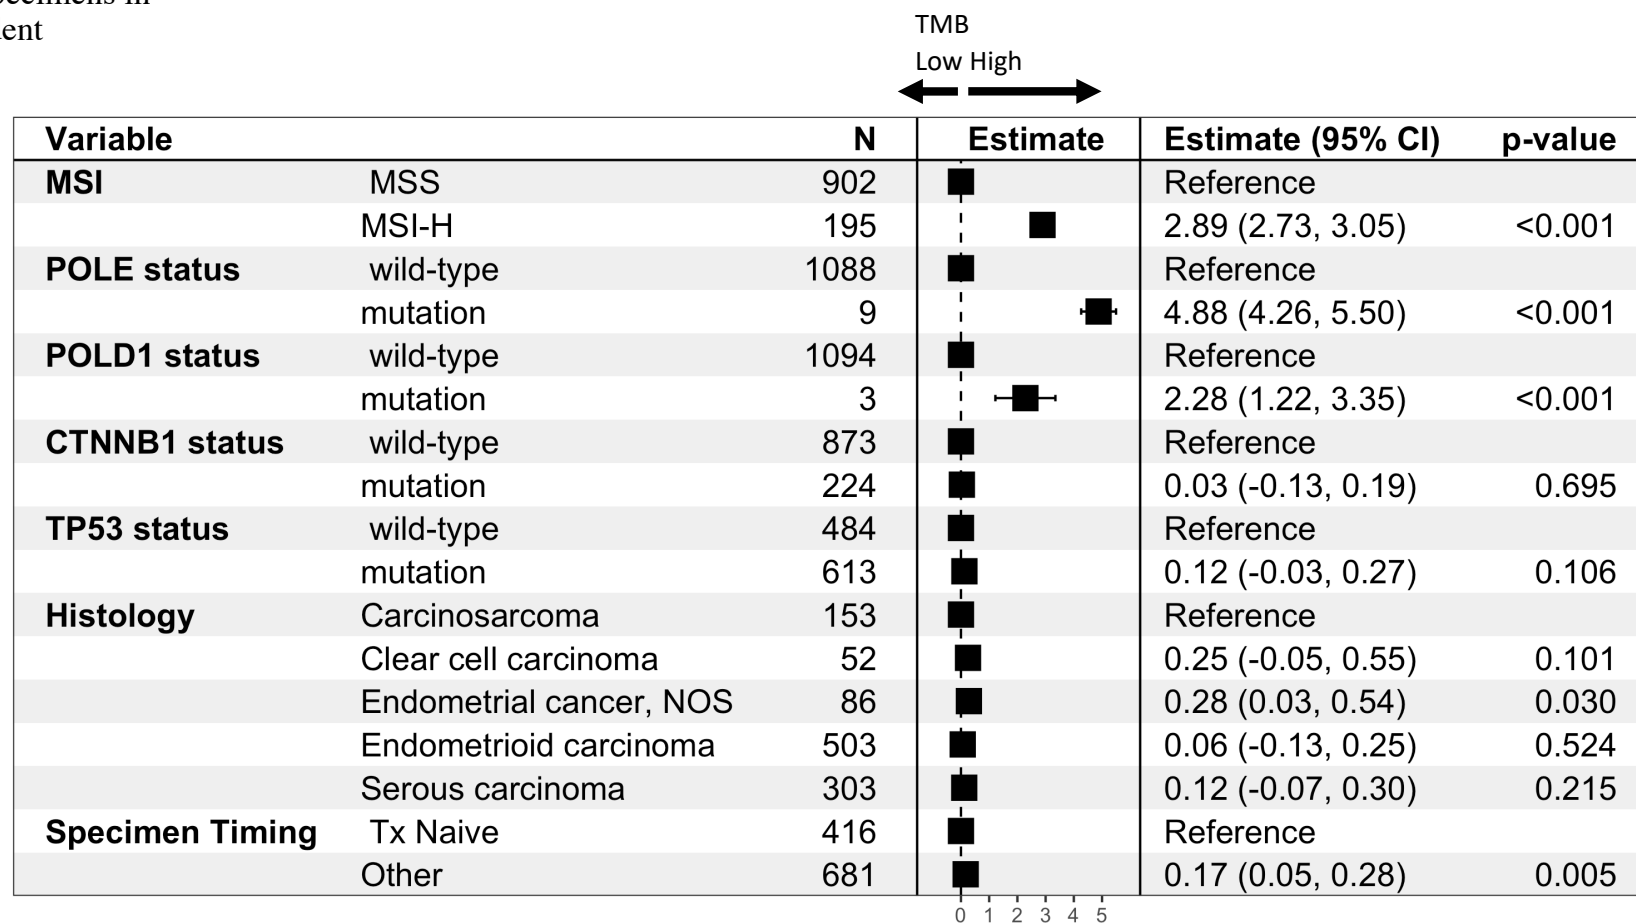

Supplement: inline-supplementary-material-5 [file inline-supplementary-material-5.pdf]
